# Supplementary material
Source: publisher figshare collection journal article supplement (https://gsajournals.figshare.com/ndownloader/files/26193629)
Supplement: Supplementary file 1 [file 26193629]

## Sheet: Table S5
Table S5. List of top BLASTP hits in rice and Arabidopsis for the nine maize candidate genes identified for elemental grain phenotypes via a genome-wide association study in the maize Ames panel
Maize gene ID	Query length (amino acids)	Annotated maize gene function	Species	Rice/Arabidopsis homolog gene ID	Rice/Arabidopsis homolog gene descriptiona	Ortholog to maize gene (www.maizegdb.org; www.gramene.org)	Syntenic ortholog to maize genec	Rice/Arabidopsis homolog sequence ID	Subject length (amino acids)	Identities	Positives	Gaps	BLASTP bit score	BLASTP E-value
Zm00001d041590	702	B transporter (rte2)	Rice	Os12g0566000/LOC_Os12g37840.1	BOR1	Yes	Yes	Os12g0566000-02	712	656/713 (92%)	680/713 (95%)	13/713 (1%)	1287	0
				Os01g0175700/LOC_Os01g08020.1	BOR2	No	No	Os01t0175700-01	673	373/646 (57%)	479/646 (74%)	11/646 (1%)	781	0
				Os01t0175600/LOC_Os01g08020.1	BOR3	No	No	Os01t0175600-01	673	384/691 (55%)	490/691 (70%)	25/691 (3%)	780	0
			Arabidopsis	AT3G62270	BOR2	Yes	-	AT3G62270.1	703	555/694 (80%)	617/694 (89%)	16/694 (2%)	1104	0
				AT2G47160	BOR1	Yes	-	AT2G47160.1	704	549/690 (80%)	615/690 (89%)	15/690 (2%)	1077	0
				AT3G06450	HCO3- transporter family	Yes	-	AT3G06450.4	732	486/688 (71%)	581/688 (84%)	20/688 (3%)	966	0
Zm00001d011063	82	Metal chelator (MT)	Rice	Os05g0111300/LOC_Os05g02070.2	MT-I-2c, MT2b	Yes	Maize gene not listed	Os05t0111300-01	85	29/48 (60%)	32/48 (66%)	5/48 (10%)	49.7	4E-07
				Os12g0570700/LOC_Os12g38270.1	MT-I-4a, MT1b	No	Maize gene not listed	Os12t0570700-01	79	35/81 (43%)	44/81 (54%)	3/81 (3%)	48.5	8E-07
				Os11t0704500/LOC_Os11g47809.1	MT-I-1A	No	Maize gene not listed	Os11t0704500-01	75	25/58 (43%)	35/58 (60%)	2/58 (3%)	39.3	6E-04
			Arabidopsis	AT3G09390b	MT2A	No	-	AT3G09390.1	81	25/66 (38%)	36/66 (54%)	5/66 (7%)	30	0.43
Zm00001d011013	1052	Ca transporter (cap1)	Rice	Os03g0281600/LOC_Os03g17310.1	ECA1	No	No	Os03t0281600-01	1063	830/1037 (80%)	912/1037 (87%)	13/1037 (1%)	1679	0
				Os05g0120700/LOC_Os05g02940.1	ATPase, P-type, K/Mg/Cd/Cu/Zn/Na/Ca/Na/H-transporter family protein	Yes	Yes	Os05t0120700-01	282	248/272 (91%)	259/272 (95%)	3/272 (1%)	491	1e-138
				Os03g0730800/LOC_Os03g52090.1	ECA2	No	No	Os03t0730800-01	641	294/650 (45%)	394/650 (60%)	52/650 (8%)	452	5e-127
			Arabidopsis	AT1G07670	ECA4	Yes	-	AT1G07670.2	1061	749/1021 (73%)	876/1021 (86%)	6/1021 (1%)	1444	0
				AT1G07810	ECA1	Yes	-	AT1G07810.1	1061	752/1027 (73%)	877/1027 (85%)	6/1027 (1%)	1441	0
				AT4G00900	ECA2	No	-	AT4G00900.2	1054	680/1039 (65%)	808/1039 (78%)	16/1039 (2%)	1286	0
Zm00001d030846	566	Metal transporter (NRAMP)	Rice	Os12g0581600/LOC_Os12g39180.1	NRAMP7	Yes	Yes	Os12t0581600-01	542	460/546 (84%)	487/546 (89%)	26/546 (4%)	870	0
				Os03g0208500/LOC_Os03g11010.1	NRAMP2	No	No	Os03t0208500-01	525	349/528 (66%)	413/528 (78%)	31/528 (5%)	703	0
				Os06t0676000/LOC_Os06g46310.1	NRAMP3	No	No	Os06t0676000-01	551	187/488 (38%)	284/488 (58%)	52/488 (10%)	311	6e-85
			Arabidopsis	AT1G47240	NRAMP2	Yes	-	AT1G47240.1	530	345/462 (75%)	399/462 (86%)	22/462 (5%)	706	0
				AT2G23150	NRAMP3	Yes	-	AT2G23150.1	509	342/465 (74%)	393/465 (85%)	22/465 (5%)	695	0
				AT5G67330	NRAMP4	Yes	-	AT5G67330.1	512	338/469 (72%)	392/469 (84%)	30/469 (6%)	683	0
Zm00001d042939	406	Metal transporter (MTP)	Rice	Os01g0837800/LOC_Os01g62070.1	MTP11	Yes	Yes	Os01t0837800-01	416	352/376 (93%)	366/376 (97%)	1/376 (0%)	713	0
				Os05g0461900/LOC_Os05g38670.1	MTP6	No	No	Os05t0461900-00	377	298/401 (74%)	314/401 (78%)	43/401 (10%)	550	9e-157
				Os01t0130000/LOC_Os01g03914.1	MTP9	No	No	Os01t0130000-01	392	217/369 (58%)	280/369 (75%)	6/369 (1%)	427	6e-120
			Arabidopsis	AT2G39450	MTP11	Yes	-	AT2G39450.1	394	297/373 (80%)	339/373 (91%)	2/373 (1%)	561	0
				AT1G79520	Cation efflux family protein	No	-	AT1G79520.4	349	225/333 (68%)	280/333 (84%)	2/333 (1%)	456	1e-160
				AT1G16310	Cation efflux family protein	No	-	AT1G16310.1	428	228/374 (61%)	293/374 (78%)	3/374 (1%)	452	4e-158
Zm00001d033053	476	Mo transporter (MOT; mo1)	Rice	Os08g0101500/LOC_Os08g01120.1	MOT1;1	Yes	No	Os08t0101500-01	456	348/471 (73%)	385/471 (81%)	34/471 (7%)	577	7e-165
				Os01t0645900/LOC_Os01g45830.1	SULTR5;1	No	No	Os01t0645900-01	464	238/427 (55%)	305/427 (71%)	38/427 (8%)	427	1e-119
			Arabidopsis	AT2G25680	MOT1	Yes	-	AT2G25680.1	456	116/168 (69%)	142/168 (85%)	2/168 (1%)	240	9e-74
				AT1G80310	MOT2	No	-	AT1G80310.1	464	120/194 (62%)	155/194 (80%)	1/194 (1%)	189	3e-54
Zm00001d033446	381	Metal transporter (ZIP; irt1)	Rice	Os03g0667500/LOC_Os03g46470.1	ZIP10, IRT1	Yes	Yes	Os03t0667500-01	375	263/346 (76%)	290/346 (83%)	12/346 (3%)	506	8e-144
				Os03g0667300/LOC_Os03g46454.1	IRT2	No	No	Os03t0667300-00	371	253/388 (65%)	288/388 (74%)	27/388 (6%)	475	2e-134
				Os05g0472700/LOC_Os05g39560.1	ZIP5	No	No	Os05t0472700-01	354	172/367 (46%)	235/367 (64%)	25/367 (6%)	305	3e-83
			Arabidopsis	AT1G31260	ZIP10	No	-	AT1G31260.1	364	189/332 (57%)	244/332 (73%)	10/332 (3%)	343	1e-116
				AT2G04032	ZIP7	Yes	-	AT2G04032.1	365	180/330 (55%)	230/330 (70%)	9/330 (3%)	342	4e-116
				AT4G19690	IRT1	No	-	AT4G19690.2	347	180/329 (55%)	224/329 (68%)	23/329 (7%)	325	1e-109
Zm00001d017427	678	Metal-NA transporter (YSL; ysl2)	Rice	Os02g0650300/LOC_Os02g43410.1	YSL15	No	No	Os02t0650300-01	673	480/679 (70%)	564/679 (83%)	8/679 (1%)	988	0
				Os02g0649900/LOC_Os02g43370.1	YSL2	No	No	Os02t0649900-01	675	485/685 (70%)	563/685 (82%)	27/685 (3%)	982	0
				Os04g0542800/LOC_Os04g45900.1	YSL16	No	No	Os04t0542800-01	676	489/674 (72%)	566/674 (83%)	10/674 (1%)	976	0
			Arabidopsis	AT5G24380	YSL2	Yes	-	AT5G24380.1	664	397/639 (62%)	502/639 (79%)	6/639 (1%)	798	0
				AT5G53550	YSL3	Yes	-	AT5G53550.6	675	403/640 (63%)	508/640 (79%)	9/640 (1%)	794	0
				AT4G24120	YSL1	Yes	-	AT4G24120.1	673	370/637 (58%)	482/637 (76%)	10/637 (2%)	739	0
Zm00001d022557	363	Metal chelator (NAS; nas5)	Rice	Os07g0689600/LOC_Os07g48980.1	NAS3	Yes	Maize gene not listed	Os07t0689600-01	344	252/320 (78%)	276/320 (86%)	4/320 (1%)	483	5e-137
				Os03g0307200/LOC_Os03g19420.2	NAS2	No	Maize gene not listed	Os03t0307200-01	327	222/328 (67%)	254/328 (77%)	8/328 (2%)	407	4e-114
				Os03t0307300/LOC_Os03g19427.1	NAS1	No	Maize gene not listed	Os03t0307300-01	333	220/328 (67%)	251/328 (76%)	5/328 (1%)	406	9e-114
			Arabidopsis	AT1G56430	NAS4	Yes	-	AT1G56430.1	324	143/272 (53%)	191/272 (70%)	4/272 (1%)	259	2e-84
				AT1G09240	NAS3	Yes	-	AT1G09240.1	320	146/313 (47%)	202/313 (65%)	12/313 (4%)	251	2e-81
				AT5G56080	NAS2	Yes	-	AT5G56080.1	320	134/270 (50%)	182/270 (67%)	6/270 (2%)	241	3e-77
aRice gene description is from https://rapdb.dna.affrc.go.jp, and Arabidopsis gene description is from https://www.arabidopsis.org
bThis result is from NCBI BLASTP with default parameters
chttps://doi.org/10.6084/m9.figshare.7926674.v1
